# Supplementary material for: Uncovering biologically significant lipid isomers with liquid chromatography, ion mobility spectrometry and mass spectrometry
Source: Royal Society of Chemistry journal article supplement (doi:10.1039/c5an02062j), 2016-01-01
Supplement: c5an02062j1.xlsx [file c5an02062j1.xlsx]

## Sheet: Sheet1
Lipid standards for IMS		Pos	Neg
Phospholipids	Catalog #/Vendor	[M+H]+	[M-H]-
CL (14:0/14:0/14:0/14:0)	710332P Avanti	1241.85	1239.84
PA (18:0/18:0)	830865P Avanti	705.544	703.528
PC (14:0/14:0)	850345P Avanti	678.508	676.492
PC (16:1/16:1) (del9-cis)	850358P Avanti	730.539	728.523
PC(16:0/18:0)	850456P	762.601	760.585
PC(18:0/16:0)	850465P	762.601	760.585
PC(14:0/16:0)	850445P Avanti	706.539	704.523
PC(16:0/14:0)	850454P Avanti	706.539	704.523
PC(16:0/18:1(9Z))	850457P Avanti	760.586	758.57
PC(18:1(9Z)/16:0)	850475P Avanti	760.586	758.57
PC (18:1/18:1) (del9-cis)	850375P Avanti	786.601	784.585
PC (18:1/18:1) (del9-trans)	850376P Avanti	786.601	784.585
PC (23:0/23:0)	850372P Avanti	930.789	928.773
PC(14:0/0:0)	855575P Avanti	468.309	466.293
PC(16:0/9:0(COOH))	870601P Avanti	652.456	650.44
PC(18:1/0:0)	845875P Avanti	522.356	520.34
PC(24:0/0:0)	855800P Avanti	608.466	606.45
PC(O-18:0/18:0)	999991P Avanti	762.674	760.658
PE (12:0/12:0)	850702P Avanti	580.398	578.382
PE (18:0/18:0)	850715P Avanti	748.586	746.57
PE (18:0/18:1(9Z))	850758P Avanti	746.57	744.554
PE (18:1/18:1) (del9-cis)	850725P Avanti	744.555	742.539
PE (18:1/18:1) (del9-trans)	850726P Avanti	744.555	742.539
PE(14:0/0:0)	856735P Avanti	426.262	424.246
PE(18:0/0:0)	856715P Avanti	482.325	480.309
PE(18:1(9Z)/0:0)	846725P Avanti	480.309	478.293
PG (14:0/14:0)	840445P Avanti	667.455	665.439
PG (16:0/16:0) 4Me	850404P Avanti	835.643	833.627
PG (17:0/17:0)	830456P Avanti	751.549	749.533
PG (18:1/18:1) (del9-cis)	840475P Avanti	775.549	773.533
PG (18:1/18:1) (del9-trans)	840477P Avanti	775.549	773.533
PG(14:0/0:0)	858120P Avanti	457.257	455.241
BMP (14:0/14:0) (S,R)	857131P Avanti	667.455	665.439
PS (14:0/14:0)	840038P Avanti	624.388	622.372
Glycerolipids
DG (12:0/12:0)	800812P Avanti	457.389	455.373
DG (16:0/18:1)	800815C Avanti	595.53	593.514
TG (14:0/16:1/14:0)	110558 Avanti	749.666	747.65
TG (18:1/18:1/18:1)	LM-3217 Avanti	885.791	883.775
Sphingolipids
18:0 phytoceramide	2034 Matreya	584.562	582.546
alpha hydrooxy ceramide (C12)	2042 Matreya	476.482	474.466
Cer(d18:1/17:0)	860517P Avanti	552.536	550.52
dihydroceramide (C8)	1854 Matreya	428.41	426.395
GalCer(d18:1/12:0)	860544P Avanti	644.51	642.494
GluCer(d18:1/16:0)	860539P Avanti	700.573	698.557
LacCer(d18:1/0:0)	860542P Avanti	624.396	622.38
LacCer(d18:1/8:0)	860541P Avanti	750.501	748.485
Ganglioside GM3 (bovine milk)	860058P Avanti	1181.75	1179.74
	860058P Avanti	1195.77	1193.75
	860058P Avanti	1209.78	1207.77
	860058P Avanti	1223.8	1221.78
	860058P Avanti	1237.81	1235.8
	860058P Avanti	1251.83	1249.81
	860058P Avanti	1265.85	1263.83
SM(d18:1/12:0)	860583P Avanti	647.513	645.497
SM(d18:1/17:0)	860585P Avanti	717.591	715.575
18:0(2R-OH) Ceramide	110989 Avanti	582.546	580.53
18:0(2S-OH) Ceramide	110990 Avanti	582.546	580.53
Plant lipids
DGDG(18:3/18:3)*	840524P Avanti	937.589	935.573
DGDG(18:2/18:3)	840524P Avanti	939.605	937.589
DGDG(16:3/18:3)	840524P Avanti	909.558	907.542
DGDG(16:3/18:2)	840524P Avanti	911.573	909.557
DGDG(16:1/18:3)	840524P Avanti	913.589	911.573
DGDG(16:0/18:3)	840524P Avanti	915.605	913.589
DGDG(18:2/18:2)	840524P Avanti	941.62	939.604
MGDG(18:3/18:3)	840523P Avanti	775.536	773.52
MGDG(18:2/18:3)	840523P Avanti	777.552	775.536
MGDG(16:3/18:3)*	840523P Avanti	747.505	745.489
MGDG(16:3/18:2)	840523P Avanti	749.52	747.505
MGDG(16:1/18:3)	840523P Avanti	751.536	749.52
MGDG(16:0/18:3)	840523P Avanti	753.552	751.536
MGDG(18:2/18:2)	840523P Avanti	779.567	777.552
